# Supplementary material for: Bridging the Achievement Gap: A Metacognitive Intervention to Enhance Analytical Reasoning and Reduce Cognitive Bias in High- and Low-Achieving Students
Source: Research Square preprint supplement (doi:10.21203/rs.3.rs-7408588/v1), 2025-10-29
Supplement: Supplementary file 1 [file 988792ece71b69c028700494.docx]

**Instrument 1**

**Analytical Reasoning Scale (ARS)**

**Instructions for Participants:**
This scale is designed to assess your analytical and reasoning skills. It is not a test of your prior knowledge. Please read each of the following scenarios carefully and select the single best answer for each question. There is no time limit, but please work efficiently and thoughtfully.

**Section A: Deconstructive Analysis**
*(Assesses the ability to break down arguments, identify flaws, and recognize unstated assumptions.)*

**1. A university student posts the following online:** "The university’s new online registration system is a complete failure. My friend tried to register for his classes at 9:00 AM and the system crashed. This proves the IT department is incompetent and the university should go back to the old paper-based system."
**What is the most significant logical flaw in this argument?**
a) The argument does not consider that other students may have registered successfully.
b) The argument relies on a single personal anecdote to make a broad generalization about the entire system.
c) The argument fails to mention which department the friend was trying to register for.
d) The argument assumes the old paper-based system had no problems of its own.

**2. An academic article summary states:** "Our study found that students who reported using a digital calendar to plan their study time had a higher GPA than those who did not. Therefore, providing all students with a subscription to a digital calendar app will improve academic achievement across the university."
**What crucial assumption does the conclusion depend on?**
a) That all students own a smartphone or laptop.
b) That the digital calendar is the *cause* of the higher GPA, rather than just being correlated with the habits of already organized students.
c) That the students who didn't use a calendar used a less effective paper-based planner.
d) That the university can afford the subscription for all students.

**3. A university announcement reads:** "We must either increase tuition fees by 10% or face significant cuts to library hours and student services. The choice is clear."
**This statement is an example of what kind of flawed reasoning?**
a) An appeal to emotion, by making students worry about losing services.
b) A hasty generalization, by assuming all students can afford the increase.
c) A false dichotomy, by presenting only two extreme options as if they are the only possibilities.
d) An ad hominem attack, by criticizing those who might oppose the tuition increase.

**Section B: Synthetic Reasoning**
*(Assesses the ability to integrate multiple pieces of information to form a logical conclusion.)*

**4. Consider the following data from the College of Basic Education:**

- **Fact 1:** The number of students seeking tutoring from the Academic Support Center triples in the last month of the semester.
- **Fact 2:** A student survey indicates that "managing deadlines for final projects" is the top reported source of stress in the last month of the semester.
- **Fact 3:** The campus coffee shop’s sales of coffee and energy drinks increase by 150% in the last month of the semester.
  **Synthesizing these three facts, what is the most logical conclusion?**
  a) Students who drink more coffee are more likely to need tutoring.
  b) The final month of the semester is characterized by heightened academic pressure, leading to increased help-seeking behavior and reliance on stimulants.
  c) The Academic Support Center should partner with the coffee shop to offer discounts.
  d) Final projects are the sole cause of student stress and increased coffee consumption.

**5. Review the following table on student enrollment in two different majors over three years:**
*Student Enrollment in Education and Business Majors by Year*

| **Year** | **Education Majors** | **Business Majors** |
| --- | --- | --- |
| 2021 | 450 | 300 |
| 2022 | 475 | 350 |
| 2023 | 500 | 400 |

**Which statement accurately synthesizes the data presented in the table?**
a) The Education major is more popular than the Business major.
b) The number of students in both majors has increased each year, but the rate of growth has been faster in the Business major.
c) The Business major will soon have more students than the Education major.
d) Enrollment in the college is growing steadily.

**Section C: Applied Reasoning**
*(Assesses the ability to apply logical principles to solve a novel problem.)*

**6. Four students—Fatima, Ali, Nora, and Yousef—are working on a group project. They must each complete one task: Research, Writing, Design, or Presentation.**

- Ali will not do the Design or the Presentation.
- Nora’s only available time is after the Writing task is finished, so she must do the Presentation.
- Fatima is assigned either the Research or the Writing task.
- Yousef’s task is the one Ali will not do, other than the Presentation.
  **Based on these rules, who is responsible for the Writing task?**
  a) Fatima
  b) Ali
  c) Yousef
  d) It cannot be determined.

**Instrument 2**

**Cognitive Bias Scale (CBS)**

**Instructions for Participants:** The following questions describe various academic situations. For each question, please select the option that best reflects what you would *most likely* think or do in that situation. There are no right or wrong answers; please respond as honestly as possible.

**1. (Confirmation Bias):** You believe that studying in long, intensive sessions (cramming) is more effective for you than studying in shorter, spaced-out sessions. When looking for study advice online, which article title are you most likely to click on first?
a) "The Proven Benefits of Spaced Repetition for Long-Term Memory"
b) "Cramming vs. Spaced Study: A Scientific Comparison"
c) "Why Cramming is the Best Way to Ace Your Exams"
d) "How to Create a Balanced Study Schedule"

**2. (Anchoring Bias):** Your professor mentions in class that the final research paper should be "around 10 pages long." Later, you are working on a different, unrelated assignment for another class—a short reflection essay. The instructions for the essay are simply "write a brief reflection." What length do you aim for?
a) 1-2 pages.
b) 3-4 pages.
c) 5-6 pages.
d) 7-8 pages.
*(Scoring Note: The irrelevant anchor "10 pages" is designed to pull respondents toward higher page counts like C or D.)*

**3. (Overconfidence Bias):** You have just finished a difficult multiple-choice exam. As you leave the room, you feel quite good about your performance. How accurately do you think you can predict your final score?
a) I probably have a very accurate idea of my score, within 1-2 questions.
b) I have a good general idea, but I could be off by several questions.
c) It's very difficult to tell; my feeling could be completely wrong.
d) I am certain I got a high grade.

**4. (Confirmation Bias):** You are assigned to a group project with a student you believe is lazy and unreliable. During the first meeting, that student arrives five minutes late. How do you interpret this?
a) I recognize that traffic or a prior class could have made them late.
b) This confirms my initial belief that they are not serious about the project.
c) I will wait and see what their work is like before making a judgment.
d) I assume they must have a good reason and don't think much of it.

**5. (Overconfidence Bias):** After reading a chapter in your textbook, you feel you have understood it well. What is your most likely next step?
a) Move on to the next chapter, since I understood this one.
b) Try to explain the key concepts out loud to myself or a friend to be sure I really know them.
c) Skim the chapter again just to be safe.
d) Do a few practice questions to test my actual understanding.

**Instrument 3**

**Metacognitive Training Program (Overview)**

**Program Title:** The Metacognitive Toolkit for Academic Success (Originally in Arabic)

**Overall Objective:** To provide undergraduate students with a set of practical, evidence-based metacognitive strategies to enhance their analytical reasoning, reduce the impact of cognitive biases, and empower them to become more effective, self-regulated learners.

**Structure:** Eight weekly 60-minute workshops.

| Week | Topic | Objective(s) | Sample Activities |
| --- | --- | --- | --- |
| **1** | **Introduction: Thinking About Your Thinking** | To introduce the concept of metacognition and differentiate it from cognition. To help students identify their current learning habits. | Group discussion on "What makes a successful student?"; Personal learning habits self-assessment worksheet. |
| **2** | **Effective Planning & Goal Setting** | To teach students how to break down large assignments into manageable steps and set specific, measurable goals. | Students practice creating a detailed work plan for a sample final project; Introduction to the SMART goals framework. |
| **3** | **Active Self-Monitoring** | To train students to monitor their understanding *during* a task (e.g., reading a text or watching a lecture). | "Think-aloud" practice with a difficult academic paragraph; "Muddiest Point" reflection exercise. |
| **4** | **Reflection & Self-Evaluation** | To develop the habit of reflecting on performance *after* a task is complete to identify what worked and what didn't. | Students analyze a sample graded assignment (not their own) using an evaluation rubric; Introduction to the "Exam Wrapper" technique. |
| **5** | **Understanding Cognitive Biases** | To introduce common cognitive biases (Confirmation, Anchoring, Overconfidence) and explain how they affect academic judgment. | Students participate in interactive demonstrations that trigger each bias; Group discussion to identify examples in daily life. |
| **6** | **Strategies for Debiasing Your Thinking** | To provide practical techniques for actively countering cognitive biases. | Practice the "Consider the Opposite" strategy for a controversial topic; Brainstorming alternative interpretations for ambiguous scenarios. |
| **7** | **Cognitive Flexibility: Adapting Your Strategies** | To teach students how to evaluate the effectiveness of their strategies and change their approach when they are not working. | "Stuck in a Rut" problem-solving scenarios where the initial strategy fails; Small group discussion on when to seek help. |
| **8** | **Building Your Personal Metacognitive Plan** | To synthesize all learned strategies and help students create a personalized plan for applying them to their own studies. | Students complete a "Personal Metacognitive Toolkit" worksheet, identifying their strengths, weaknesses, and go-to strategies for future use. |

**The Metacognitive Training Program Manual**

**Program Title:** The Metacognitive Toolkit for Academic Success

**Overall Objective:** To provide undergraduate students with a set of practical, evidence-based metacognitive strategies to enhance their analytical reasoning, reduce the impact of cognitive biases, and empower them to become more effective, self-regulated learners.

**Structure:** Eight weekly 60-minute workshops. Each session follows a consistent structure: Introduction & Review, Core Concept Instruction, Guided Practice Activity, and Discussion & Wrap-up.

**Week 1: Introduction – Thinking About Your Thinking**

- **Objective:** To introduce the concept of metacognition, differentiate it from cognition, and help students establish a baseline of their current learning habits.
- **Materials:** Whiteboard, markers, "My Learning Habits" self-assessment worksheet.
- **Session Outline (60 minutes):**
  - **Introduction (10 mins):** Facilitator begins by asking a relatable question: "Have you ever read an entire page of a textbook, only to realize you have no idea what you just read?" This opens a discussion on the difference between the *act* of reading (cognition) and the *awareness* of understanding (metacognition).
  - **Core Concept Instruction (15 mins):** Metacognition is defined as "thinking about your own thinking" or "being the manager of your own mind." The facilitator uses the analogy of a coach who plans, monitors, and evaluates a player's performance. The two key components are introduced: Metacognitive Knowledge (what you know about yourself as a learner) and Metacognitive Regulation (the strategies you use to manage your learning).
  - **Guided Practice Activity (25 mins):** Students complete the "My Learning Habits" worksheet, which includes Likert-scale questions and open-ended prompts like:
    - "Before I start a big assignment, I make a detailed plan." (Scale: Never to Always)
    - "How do you know when you are confused about a topic?" (Open-ended)
    - "After you get a grade back, what is the first thing you do?" (Open-ended)
  - **Discussion & Wrap-up (10 mins):** Students share insights from their worksheets in small groups. The facilitator leads a brief whole-group discussion, connecting their habits (or lack thereof) to the concept of metacognition. The facilitator previews next week's topic: Planning.

**Week 2: Effective Planning & Goal Setting**

- **Objective:** To teach students how to deconstruct large academic tasks into manageable steps and set specific, measurable, achievable, relevant, and time-bound (SMART) goals.
- **Materials:** A sample university project description (e.g., "15-page research paper"), SMART goals worksheet, whiteboard.
- **Session Outline (60 minutes):**
  - **Introduction (5 mins):** Review the concept of metacognition. Ask students to share a time they felt overwhelmed by a large project and procrastinated.
  - **Core Concept Instruction (20 mins):** The facilitator explains that planning is the first step in metacognitive regulation. It reduces cognitive load and anxiety. The SMART goals framework is introduced with clear academic examples (e.g., a vague goal "Study for my exam" vs. a SMART goal "Review Chapters 3-5 by Wednesday, complete 20 practice problems by Friday, and attend the professor's office hours next Monday").
  - **Guided Practice Activity (25 mins):** In small groups, students are given the sample project description. Their task is to:
    1. Break the project down into at least 8 distinct steps (e.g., Topic Selection, Preliminary Research, Outline, First Draft, etc.).
    2. Create three specific SMART goals for the first half of the project, including deadlines.
  - **Discussion & Wrap-up (10 mins):** Groups share their project plans. The facilitator highlights effective strategies and reinforces that a good plan is a roadmap that makes the journey manageable.

**Week 3: Active Self-Monitoring**

- **Objective:** To train students to actively and consciously monitor their level of understanding *during* a cognitive task.
- **Materials:** A short (one-page) but conceptually dense academic text excerpt (e.g., from a philosophy or theoretical psychology article), index cards.
- **Session Outline (60 minutes):**
  - **Introduction (5 mins):** Differentiate planning (before) from monitoring (during). Ask: "How do you know, in the moment, if you are truly understanding something?"
  - **Core Concept Instruction (20 mins):** Introduce self-monitoring as a "mental check-in." Key techniques are taught:
    - **Self-Questioning:** Pausing to ask, "Does this make sense? Can I explain this in my own words?"
    - **Paraphrasing:** Mentally summarizing paragraphs as you read.
    - **Identifying "Red Flags":** Recognizing when your mind is wandering or when a concept is unclear.
  - **Guided Practice Activity (25 mins):** The facilitator first models a **"Think-Aloud"** with the first paragraph of the challenging text, verbalizing their internal monologue of questioning and checking for understanding. Then, students work in pairs to apply the think-aloud technique to the rest of the text. Afterwards, each student completes the **"Muddiest Point"** exercise, anonymously writing down the one concept from the text that is still most confusing to them on an index card.
  - **Discussion & Wrap-up (10 mins):** The facilitator collects the cards and discusses a few common "muddiest points," demonstrating that identifying confusion is the first step to resolving it.

**Week 4: Reflection & Self-Evaluation**

- **Objective:** To develop the habit of reflecting on academic performance *after* a task is complete to identify effective strategies and areas for improvement.
- **Materials:** An anonymized sample of a graded student essay with instructor comments, a blank rubric, and an "Exam Wrapper" worksheet.
- **Session Outline (60 minutes):**
  - **Introduction (5 mins):** Differentiate monitoring (during) from evaluation (after). Ask: "Besides looking at the grade, what can you learn from a returned assignment?"
  - **Core Concept Instruction (15 mins):** Explain that effective evaluation goes beyond the grade. It involves analyzing *why* you received that grade. Introduce the concept of an **"Exam Wrapper"**—a structured reflection sheet that prompts students to analyze their preparation methods and the types of errors they made.
  - **Guided Practice Activity (30 mins):** Students work in groups to analyze the sample graded essay. First, they use the blank rubric to grade it themselves. Then, they compare their evaluation to the instructor's comments. Finally, they fill out an Exam Wrapper for the sample essay, answering questions like:
    - "How did the student prepare for this assignment?" (Hypothesize)
    - "What kind of errors did the student make most often (e.g., conceptual, structural, grammatical)?"
    - "What is one piece of advice you would give this student for their next paper?"
  - **Discussion & Wrap-up (10 mins):** Discuss the value of analyzing errors. The facilitator emphasizes that self-evaluation closes the metacognitive loop, informing the planning stage for the next task.

**Week 5: Understanding Cognitive Biases**

- **Objective:** To introduce common cognitive biases (Confirmation, Anchoring, Overconfidence) and explain how they can negatively impact academic judgment.
- **Materials:** Projector for interactive polls or videos, short bias-demonstration exercises.
- **Session Outline (60 minutes):**
  - **Introduction (10 mins):** The facilitator shows a compelling optical illusion or brain teaser to demonstrate that our minds can be tricked. This introduces the idea of cognitive shortcuts (heuristics) and their potential flaws.
  - **Core Concept Instruction (25 mins):** Define cognitive bias as a systematic error in thinking. Introduce and explain the "Big Three" with academic examples:
    - **Confirmation Bias:** Searching for "evidence that online learning is ineffective" for a paper, because that's your initial belief.
    - **Anchoring Bias:** A professor mentions a historical event in 1988, and later your estimate for an unrelated number is unconsciously pulled toward 88.
    - **Overconfidence Bias:** Feeling 100% sure you aced an exam when you actually missed several key concepts.
  - **Guided Practice Activity (15 mins):** Quick, interactive demonstrations. For anchoring, ask an estimation question after providing a high or low anchor. For confirmation, present a neutral statement and ask students what evidence they would seek to prove it true.
  - **Discussion & Wrap-up (10 mins):** Small group discussion: "Share an example of when you might have been influenced by one of these biases in your studies."

**Week 6: Strategies for Debiasing Your Thinking**

- **Objective:** To provide students with practical, actionable techniques for actively countering their cognitive biases.
- **Materials:** A worksheet with a controversial academic topic (e.g., "Standardized testing should be abolished in university admissions"), whiteboard.
- **Session Outline (60 minutes):**
  - **Introduction (5 mins):** Quick review of the three main biases from the previous week.
  - **Core Concept Instruction (20 mins):** Frame the session as building a "debiasing toolkit." Introduce specific strategies:
    - **To counter Confirmation Bias:** The **"Consider the Opposite"** technique, where you force yourself to genuinely argue for the opposing viewpoint.
    - **To counter Overconfidence Bias:** The **"Pre-mortem,"** where you imagine a project has failed and work backward to figure out all the things that could have gone wrong.
    - **To counter Anchoring Bias:** The **"Resetting the Anchor"** technique, where you consciously generate new starting points for an estimate or decision.
  - **Guided Practice Activity (25 mins):** Students are given the controversial topic. Their task is to apply the "Consider the Opposite" strategy. They must list the three strongest arguments for the position they *disagree* with and find one piece of credible evidence to support each of those arguments.
  - **Discussion & Wrap-up (10 mins):** Groups share how difficult but enlightening the activity was. The facilitator emphasizes that debiasing requires deliberate effort.

**Week 7: Cognitive Flexibility – Adapting Your Strategies**

- **Objective:** To teach students to recognize when a chosen learning strategy is not effective and to pivot to a different approach.
- **Materials:** "Stuck in a Rut" worksheet with logic puzzles or trick questions.
- **Session Outline (60 minutes):**
  - **Introduction (5 mins):** Ask the group: "What's your go-to move when you're completely stuck on a problem or assignment?"
  - **Core Concept Instruction (15 mins):** Define **cognitive flexibility** as the opposite of mental rigidity. Explain that it is a key component of metacognitive regulation—it’s about knowing when to persevere with a strategy and when to abandon it for a new one. Discuss the importance of having a "Plan B."
  - **Guided Practice Activity (30 mins):** Students work on the "Stuck in a Rut" worksheet, which contains problems designed to lead them toward an obvious but incorrect approach. After a period of struggle, the facilitator stops the activity and leads a discussion on:
    - "At what point did you realize your first approach wasn't working?"
    - "What were the clues that you needed to change your strategy?"
    - "What alternative approaches could you have tried?"
  - **Discussion & Wrap-up (10 mins):** Conclude that being a successful learner isn't about always having the right answer immediately, but about having a toolkit of strategies and knowing when to switch between them.

**Week 8: Building Your Personal Metacognitive Plan**

- **Objective:** To synthesize all learned strategies and empower students to create a personalized action plan for applying them to their own academic lives.
- **Materials:** A comprehensive "Personal Metacognitive Toolkit" worksheet.
- **Session Outline (60 minutes):**
  - **Introduction (10 mins):** The facilitator provides a brief, motivating review of the entire 8-week journey, from planning and monitoring to bias awareness and flexibility, highlighting the key takeaway from each session.
  - **Core Concept Instruction (5 mins):** Emphasize that metacognition is not a topic to be "finished" but a lifelong practice. This final session is about creating a personal commitment to that practice.
  - **Guided Practice Activity (35 mins):** Students are given the "Personal Metacognitive Toolkit" worksheet to complete individually. This worksheet is the capstone of the program and includes sections such as:
    - **My Biggest Academic Challenge Is:** _______________
    - **My Go-To Planning Strategy Will Be:** _______________
    - **My Signal for When I Need to Self-Monitor More Closely Is:** _______________
    - **The Cognitive Bias I Am Most Vulnerable To Is:** _______________
    - **My Debiasing Strategy Will Be:** _______________
    - **One Commitment I Am Making to Myself as a Learner Is:** _______________
  - **Discussion & Wrap-up (10 mins):** The facilitator asks for volunteers to share one commitment from their plan. The program concludes with a final message reinforcing the students' new identity as empowered, self-regulated learners, and they are congratulated on their progress.
